# Supplementary material for: Rational Design of Daunorubicin C-14 Hydroxylase Based on the Understanding of Its Substrate-Binding Mechanism
Source: MDPI journal article supplement (doi:10.3390/ijms24098337), 2023-05-06
Supplement: s1 [file s1]

## Supplementary data

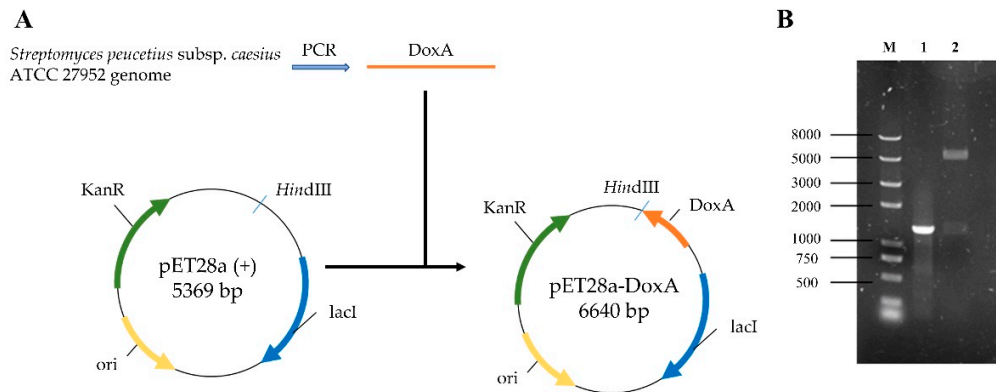

**Figure S1.** Schematic diagram of the recombinant plasmid pET28a-DoxA construction. (A): The construction of recombinant plasmid pET28a-DoxA; (B): DNA Electrophoresis profile of DoxA. Lane M: DNA marker, lane 1: *doxA* gene, lane 2: enzyme digestion of pET28a-DoxA.

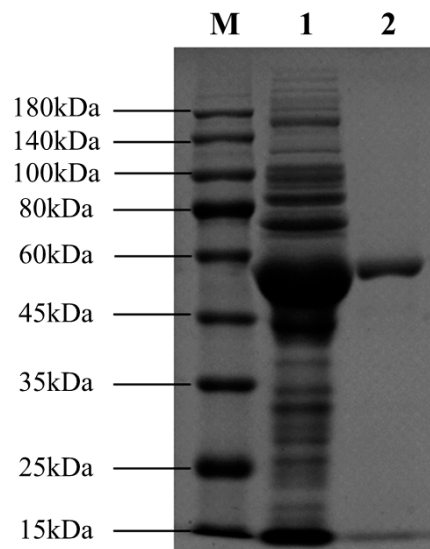

**Figure S2.** SDS-PAGE protein profile of DoxA. Lane M: protein marker, lane 1: the supernatant sample after cell fragmentation, lane 2: the purified DoxA.

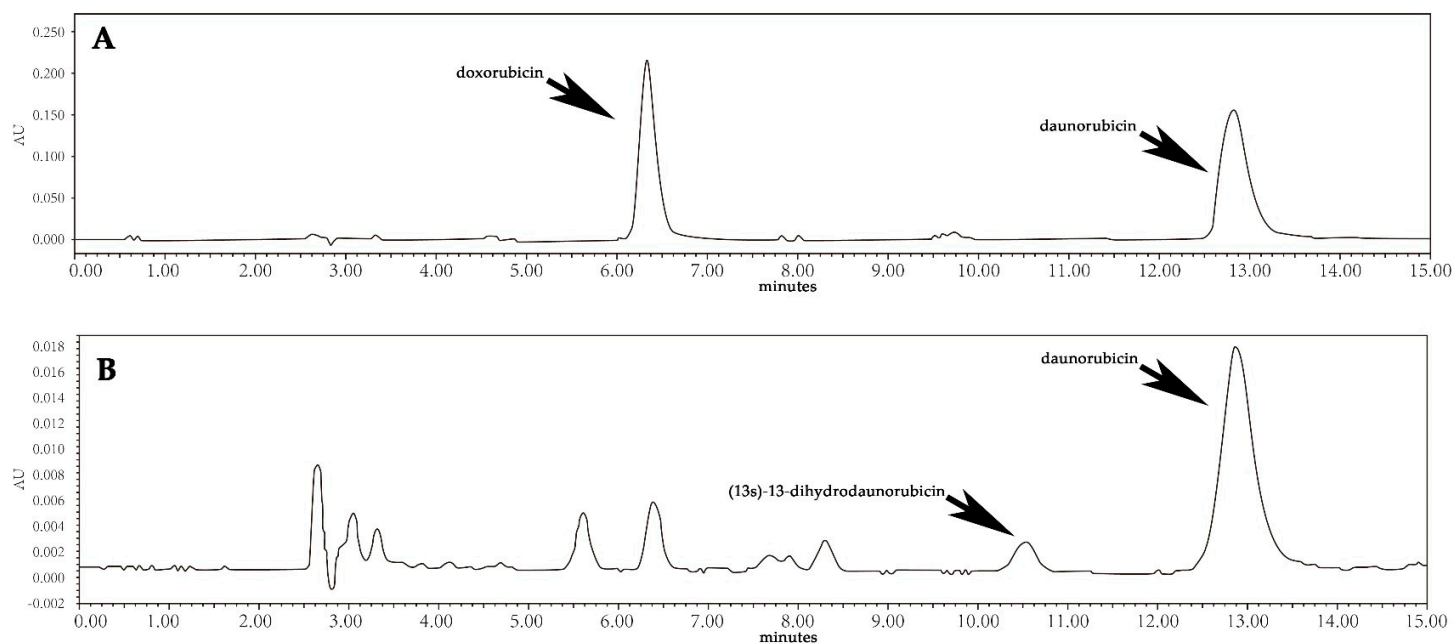

**Figure S3.** HPLC analysis of the catalytic products of daunorubicin by DoxA. **(A):** HPLC results of the doxorubicin/daunorubicin standards; **(B):** HPLC result of the sample.

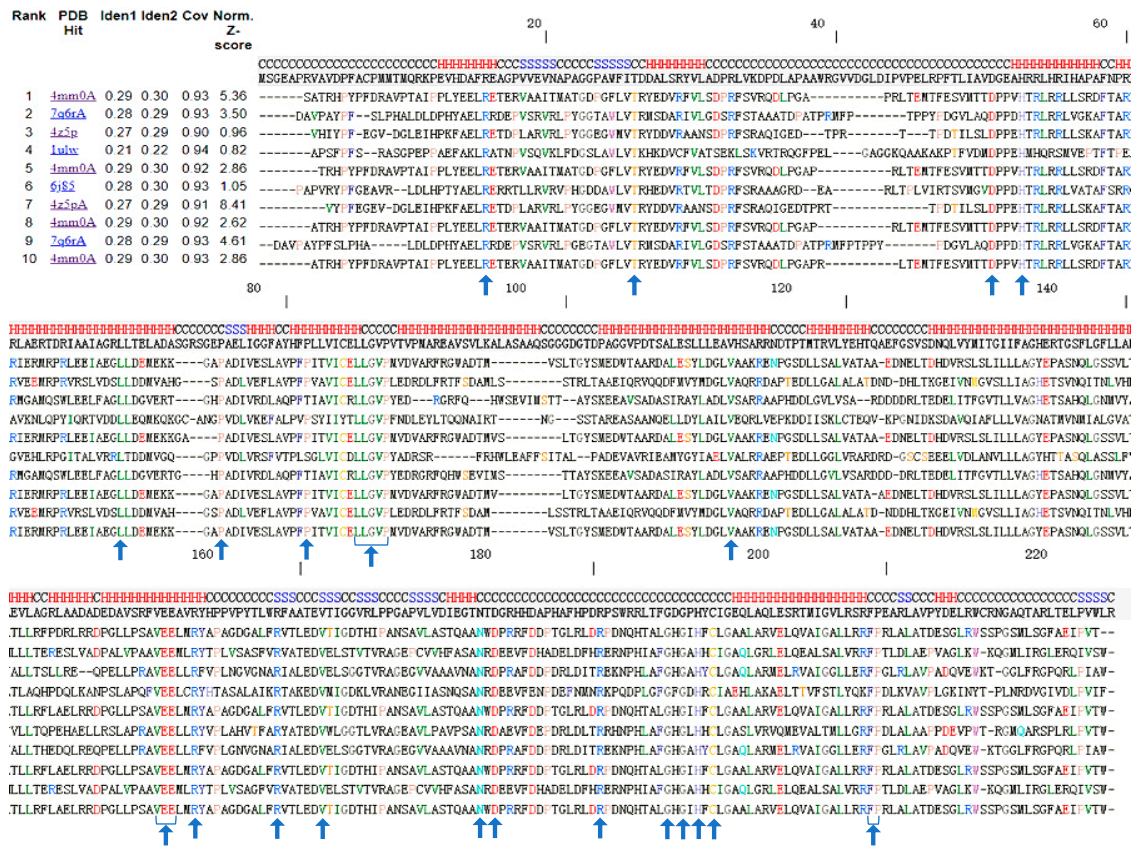

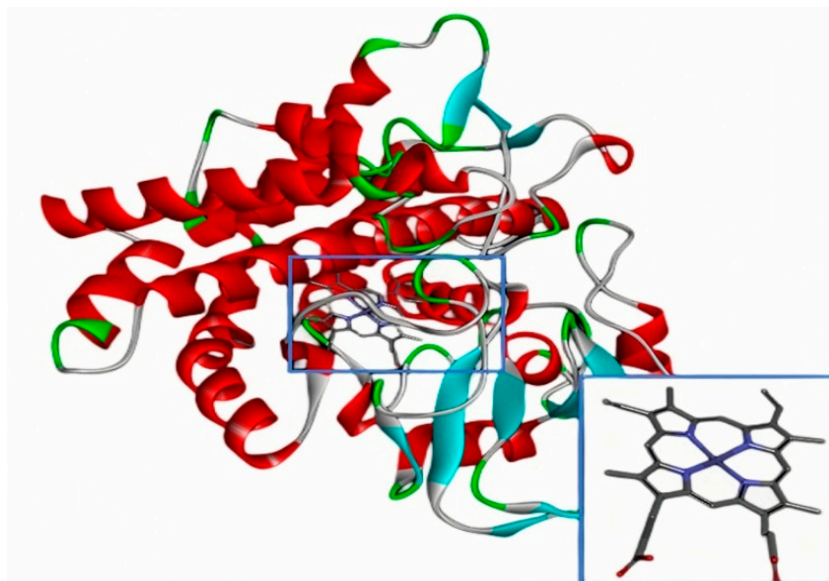

**Figure S5.** The complete DoxA-heme three-dimensional model.

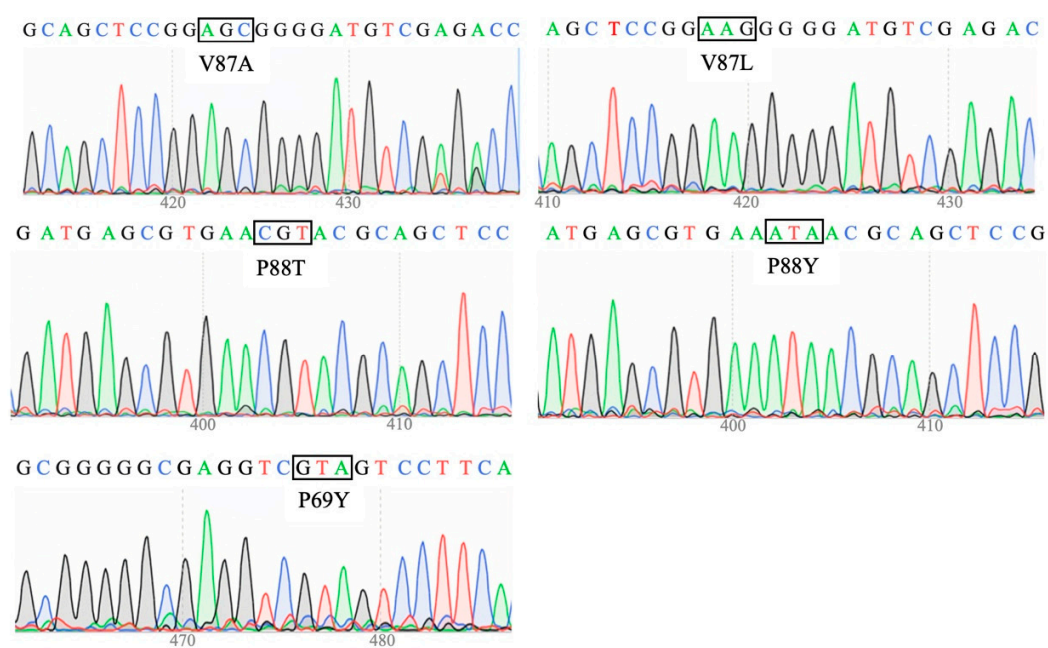

**Figure S6.** Sequence verification of the five plasmids containing DoxA mutants. (Notes: The black boxes were the mutant sites in the sequence of DoxA.)

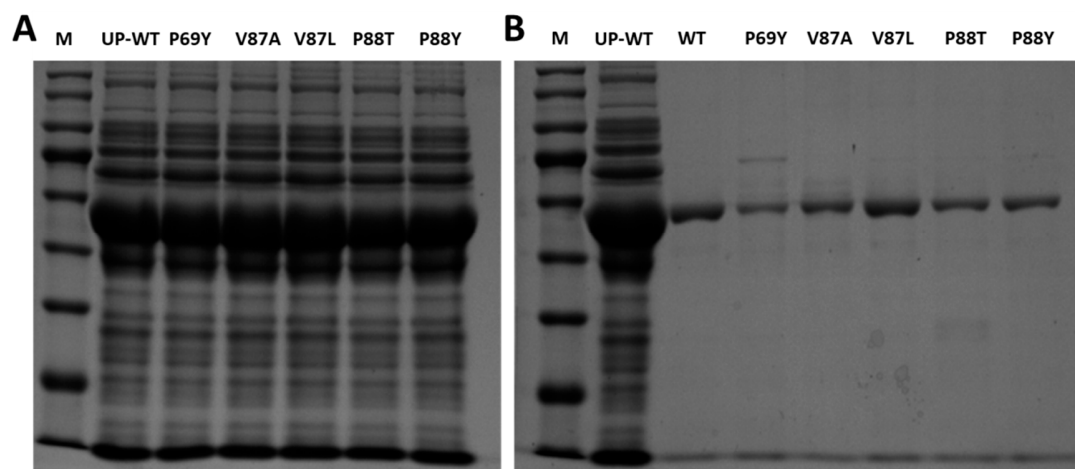

**Figure S7.** SDS-PAGE protein profile analysis of the mutants of DoxA. **(A):** the supernatant samples after cell fragmentation; **(B):** the purified proteins (Lane M: protein marker, lane UP-WT: unpurified wild-type DoxA, lane WT: purified wild-type DoxA).

**Table S1.** Free energy of DoxA-model with different protein conformations

| Name               | Score    |
|--------------------|----------|
| doxA_I-TASSER_0001 | -695.393 |
| doxA_I-TASSER_0002 | -672.837 |
| doxA_I-TASSER_0003 | -664.821 |
| doxA_I-TASSER_0004 | -708.753 |
| doxA_I-TASSER_0005 | -663.290 |
| doxA_I-TASSER_0006 | -706.663 |
| doxA_I-TASSER_0007 | -671.219 |
| doxA_I-TASSER_0008 | -700.996 |
| doxA_I-TASSER_0009 | -672.137 |
| doxA_I-TASSER_0010 | -669.950 |
| doxA_I-TASSER_0011 | -637.247 |
| doxA_I-TASSER_0012 | -702.992 |

|                    |          |
|--------------------|----------|
| doxA_I-TASSER_0013 | -672.706 |
| doxA_I-TASSER_0014 | -644.515 |
| doxA_I-TASSER_0015 | -705.554 |
| doxA_I-TASSER_0016 | -701.584 |
| doxA_I-TASSER_0017 | -676.329 |
| doxA_I-TASSER_0018 | -658.026 |
| doxA_I-TASSER_0019 | -716.475 |
| doxA_I-TASSER_0020 | -672.129 |

---

**Table S2.** Primers used in this work

| <b>Primers</b> | <b>Sequence 5'-3'</b>                |
|----------------|--------------------------------------|
| DoxA-F         | TCGAGTGCGGCCGCAAGCTTGCGCAGCCAGACGGGC |
| DoxA-R         | CGAGCTCCGTCGACAAGCTATGAGCGGCGAGGCGC  |
| PET-F          | GATCTCGATCCCGCGAA                    |
| PET-R          | GCAGCCAACTCAGCTTC                    |
| P69Y-F         | GGCGGGGGCGAGGTCGTAGTCCTTCACG         |
| P69Y-R2        | TACGACCTCGCCCCGCGCCTGGCGGG           |
| V87A-F         | CGGACGCAGCTCCGGAGCGGGGATGTCTG        |
| V87A-R         | GCTCCGGAGCTGCGTCCGTTACGCTCA          |
| V87L-F         | CGGACGCAGCTCCGGAAGGGGGATGTCTG        |
| V87L-R         | CTTCCGGAGCTGCGTCCGTTACGCTCA          |
| P88Y-F         | GGCGATGAGCGTGAAATAACGCAGCTCC         |
| P88Y-R         | TATTTACGCTCATCGCCGTGGACGGCG          |
| P88T-F         | GGCGATGAGCGTGAACGTACGCAGCTCC         |
| P88T-R         | ACGTTACGCTCATCGCCGTGGACGGCG          |
